# Supplementary material
Source: PubMed Central journal article supplement (PMC4515134)
Supplement: imm0145-0543-sd1.pdf [file imm0145-0543-sd1.pdf]

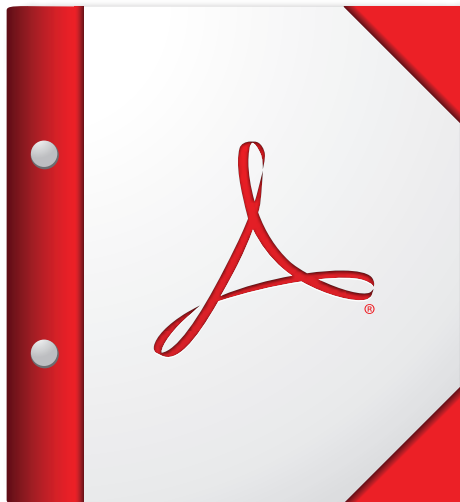

**Pour de meilleurs résultats, ouvrez ce porte-documents PDF dans Adobe Reader X, ou dans Adobe Acrobat X, ou version ultérieure.**

[Télécharger tout de suite Adobe Reader](#)
